# Supplementary material
Source: publisher site journal article supplement (https://www.spandidos-publications.com/168/downloadSupplementary)

Figure S1. GFP-LC3 plasmid transfection efficiency in human umbilical vein endothelial cells. GFP cell staining was visible in the GFP-LC3-transfected group but not in the control group. GFP, green fluorescent protein; LC3, microtubule-associated protein light chain 3.

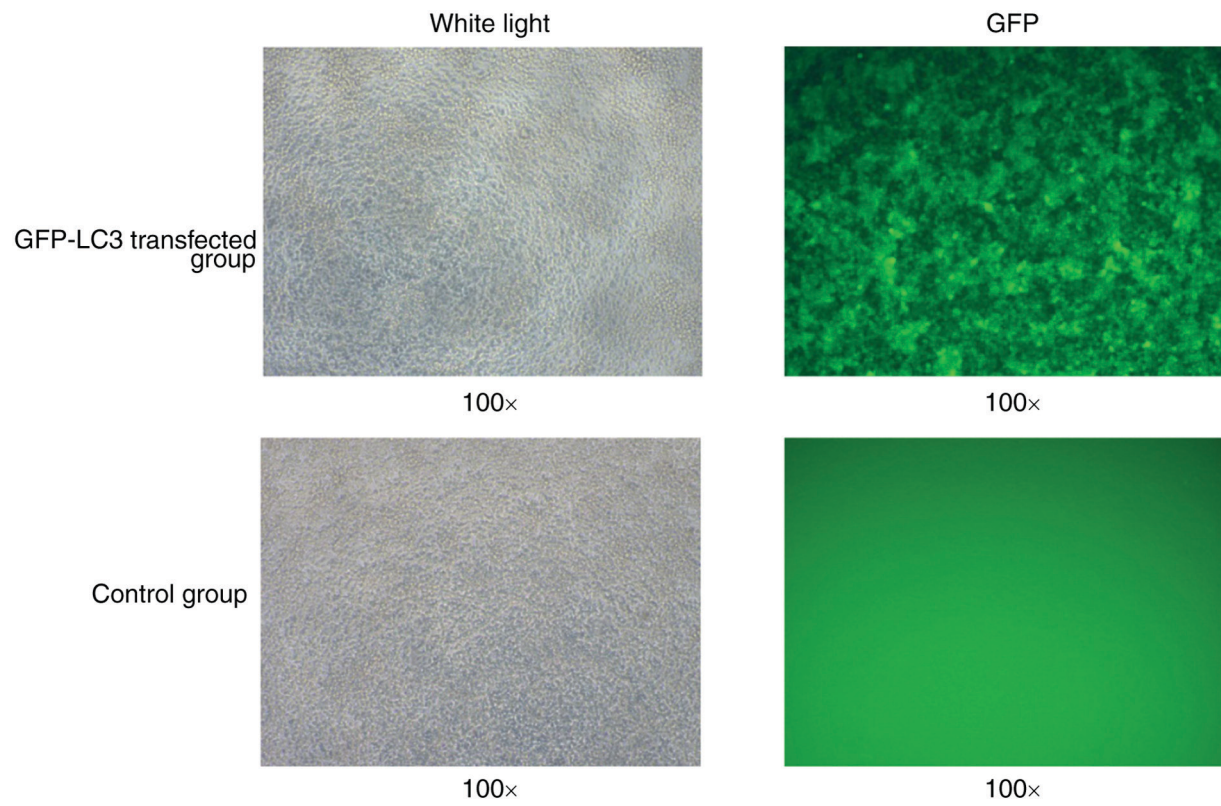

Supplement: Supplementary file 1 [file downloadSupplementary]
